# Supplementary material for: Influence of Cu insertion on the thermoelectric properties of the quaternary cluster compounds Cu3M2Mo15Se19 (M = In, K) and Cu4In2Mo15Se19
Source: Royal Society of Chemistry journal article supplement (doi:10.1039/d3tc00214d), 2023-01-01
Supplement: d3tc00214d1.pdf [file d3tc00214d1.pdf]

## Electronic Supplementary Information

### Influence of Cu insertion on the thermoelectric properties of the quaternary cluster compounds $\text{Cu}_3\text{M}_2\text{Mo}_{15}\text{Se}_{19}$ ( $M = \text{In}, \text{K}$ ) and $\text{Cu}_4\text{In}_2\text{Mo}_{15}\text{Se}_{19}$

Patrick Gougeon<sup>1,\*</sup>, Philippe Gall<sup>1</sup>, Shantanu Misra<sup>2</sup>, Adèle Léon<sup>2</sup>, Christine Gendarme<sup>2</sup>, Sylvie Migot<sup>2</sup>, Jaafar Ghanbaja<sup>2</sup>, Soufiane El Oualid<sup>2</sup>, Bertrand Lenoir<sup>2</sup>, Christophe Candolfi<sup>2,\*</sup>

<sup>1</sup> *Sciences Chimiques de Rennes, UMR 6226 CNRS – Ecole Nationale Supérieure de Chimie de Rennes – Université de Rennes 1, Avenue du Général Leclerc, 35042 Rennes, France*

<sup>2</sup> *Institut Jean Lamour, UMR 7198 CNRS – Université de Lorraine, Campus ARTEM, 2 allée André Guinier, BP 50840, 54011 Nancy, France*

\*Contact authors: [patrick.gougeon@univ-rennes1.fr](mailto:patrick.gougeon@univ-rennes1.fr); [christophe.candolfi@univ-lorraine.fr](mailto:christophe.candolfi@univ-lorraine.fr)

### Content

**Figure S1.** Rietveld refinement plot showing the observed, calculated and difference patterns of  $\text{Cu}_3\text{In}_2\text{Mo}_{15}\text{Se}_{19}$ .

**Figure S2.** PXRD patterns for the  $\text{Cu}_3\text{In}_2\text{Mo}_{15}\text{Se}_{19}$ ,  $\text{Cu}_4\text{In}_2\text{Mo}_{15}\text{Se}_{19}$  and  $\text{Cu}_3\text{K}_2\text{Mo}_{15}\text{Se}_{19}$  compounds at 300 K.

**Figure S3.** Profile matching mode refinement plot of  $\text{Cu}_3\text{In}_2\text{Mo}_{15}\text{Se}_{19}$  (upper green vertical markers) and  $\text{Cu}_x\text{Mo}_6\text{Se}_8$  (lower green vertical markers).

**Figures S4 to S6.** Elemental X-ray maps determined by SEM on polycrystalline samples of  $\text{Cu}_3\text{In}_2\text{Mo}_{15}\text{Se}_{19}$ ,  $\text{Cu}_4\text{In}_2\text{Mo}_{15}\text{Se}_{19}$  and  $\text{Cu}_3\text{K}_2\text{Mo}_{15}\text{Se}_{19}$ .

**Figure S7.** EDXS-STEM elemental maps for  $\text{Cu}_3\text{K}_2\text{Mo}_{15}\text{Se}_{19}$ .

**Figure S8.** EDXS-STEM elemental maps for  $\text{Cu}_4\text{In}_2\text{Mo}_{15}\text{Se}_{19}$ .

**Figure S9.** Magnetic field dependences of the Hall resistivity  $\rho_H$  for the  $\text{Cu}_3\text{In}_2\text{Mo}_{15}\text{Se}_{19}$  and  $\text{Cu}_4\text{In}_2\text{Mo}_{15}\text{Se}_{19}$  compounds and of the transverse electrical resistivity  $\rho_{xy}$  for  $\text{Cu}_3\text{K}_2\text{Mo}_{15}\text{Se}_{19}$ .

**Figure S10.** Temperature dependence of the hole concentration  $p_H$  for the  $\text{Cu}_3\text{In}_2\text{Mo}_{15}\text{Se}_{19}$  and  $\text{Cu}_4\text{In}_2\text{Mo}_{15}\text{Se}_{19}$  compounds.

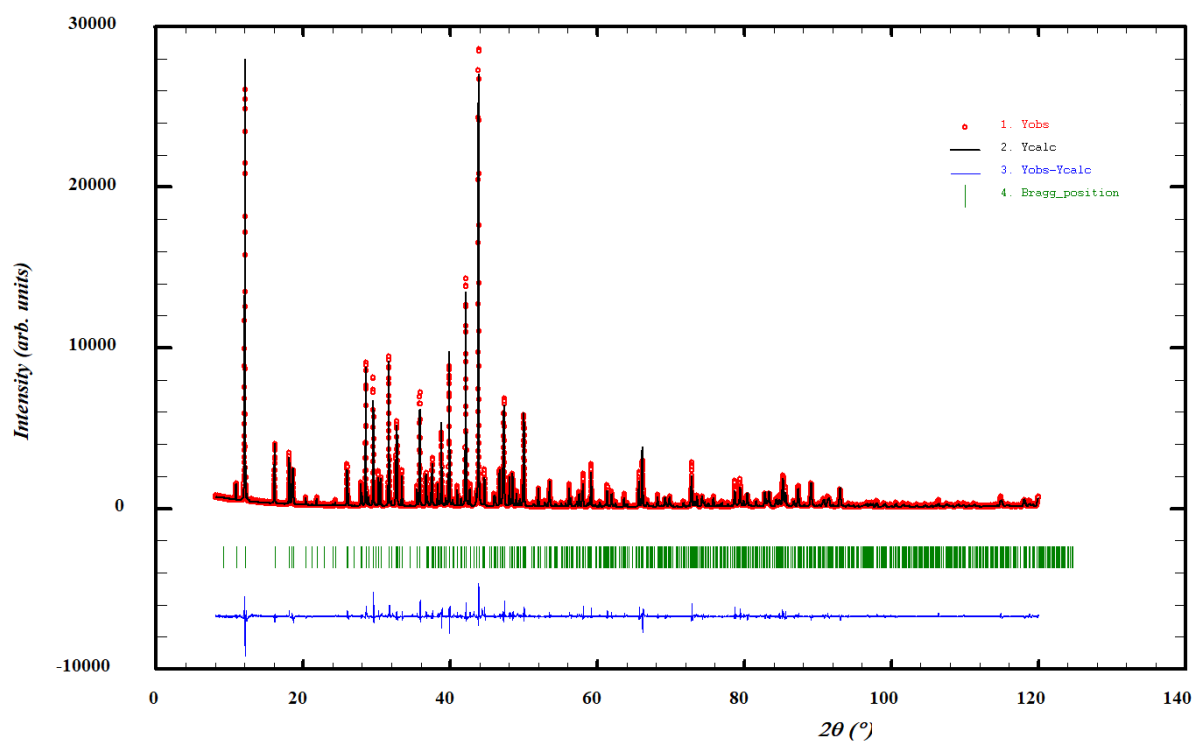

**Figure S1.** Rietveld refinement plot showing the observed, calculated and difference patterns of  $\text{Cu}_3\text{In}_2\text{Mo}_{15}\text{Se}_{19}$ .

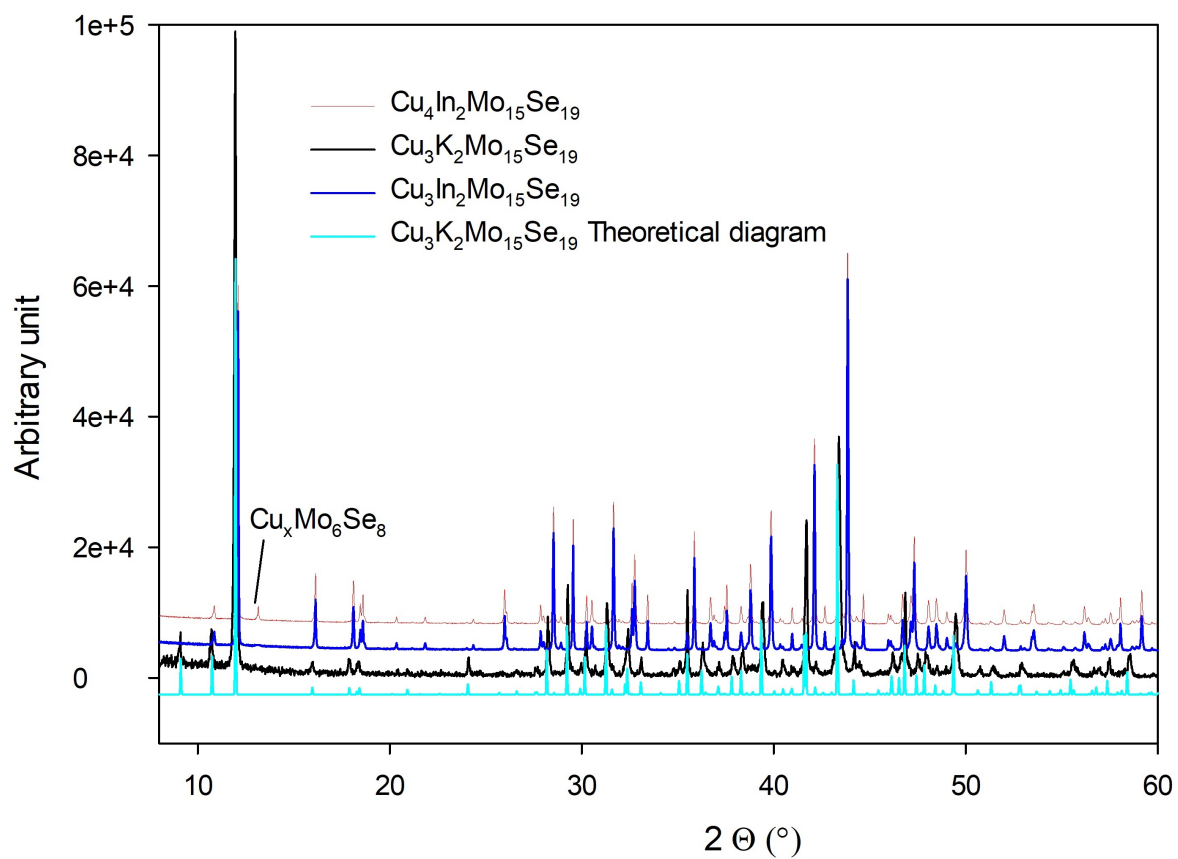

**Figure S2.** Experimental PXR D patterns at 300 K for the  $\text{Cu}_3\text{In}_2\text{Mo}_{15}\text{Se}_{19}$ ,  $\text{Cu}_4\text{In}_2\text{Mo}_{15}\text{Se}_{19}$ ,  $\text{Cu}_3\text{K}_2\text{Mo}_{15}\text{Se}_{19}$  compounds and theoretical one for  $\text{Cu}_3\text{K}_2\text{Mo}_{15}\text{Se}_{19}$ .

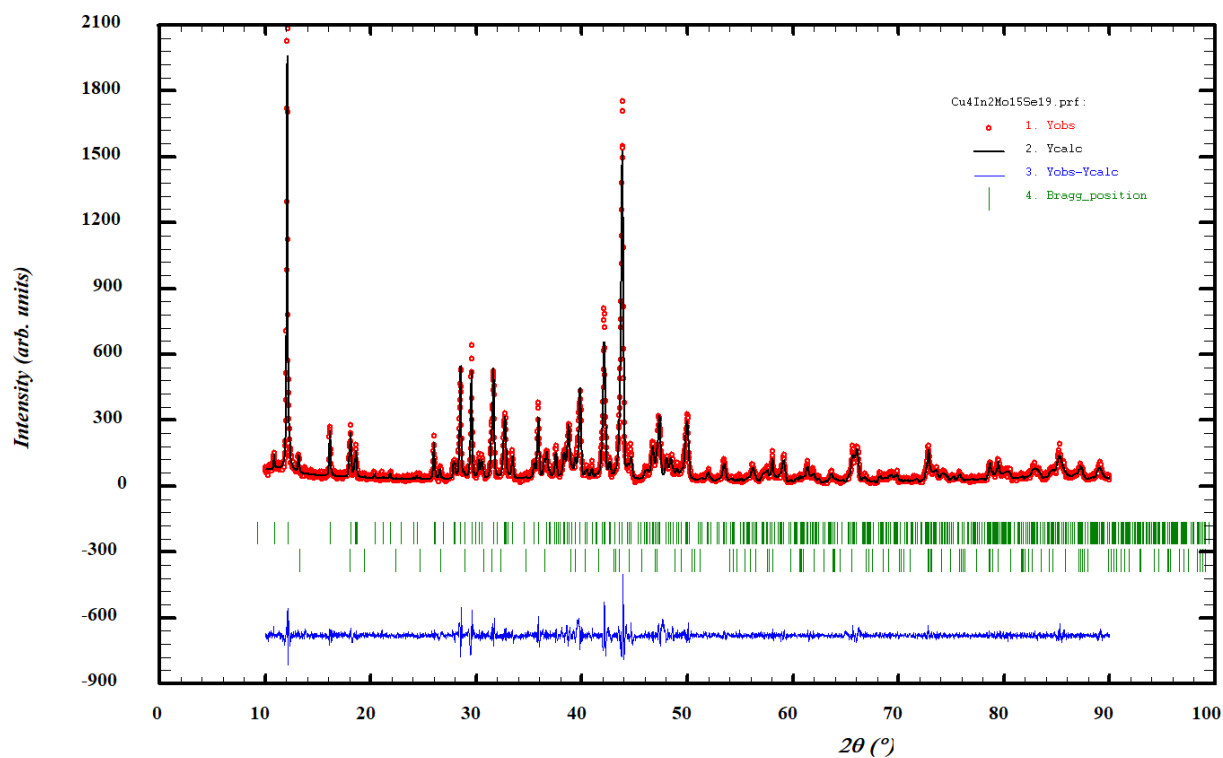

**Figure S3.** Profile matching mode refinement plot of Cu<sub>4</sub>In<sub>2</sub>Mo<sub>15</sub>Se<sub>19</sub> (upper green vertical markers) and Cu<sub>x</sub>Mo<sub>6</sub>Se<sub>8</sub> (lower green vertical markers).

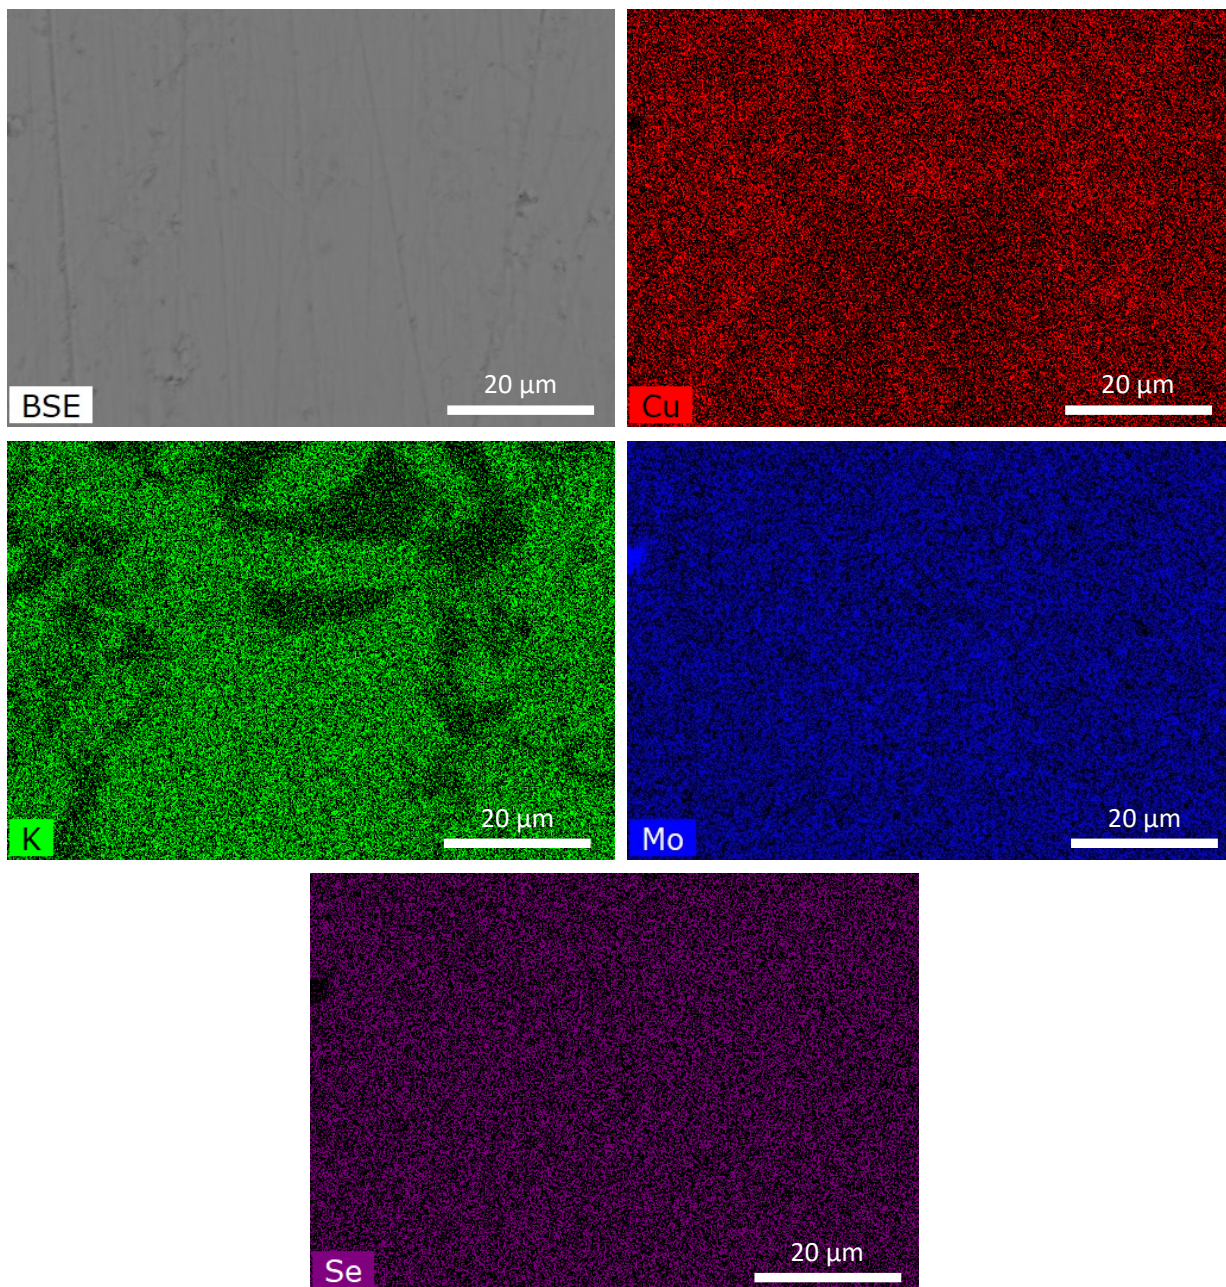

**Figure S4.** SEM image in backscattered electron mode (BSE) and its corresponding elemental X-ray maps for  $\text{Cu}_3\text{K}_2\text{Mo}_{15}\text{Se}_{19}$ .



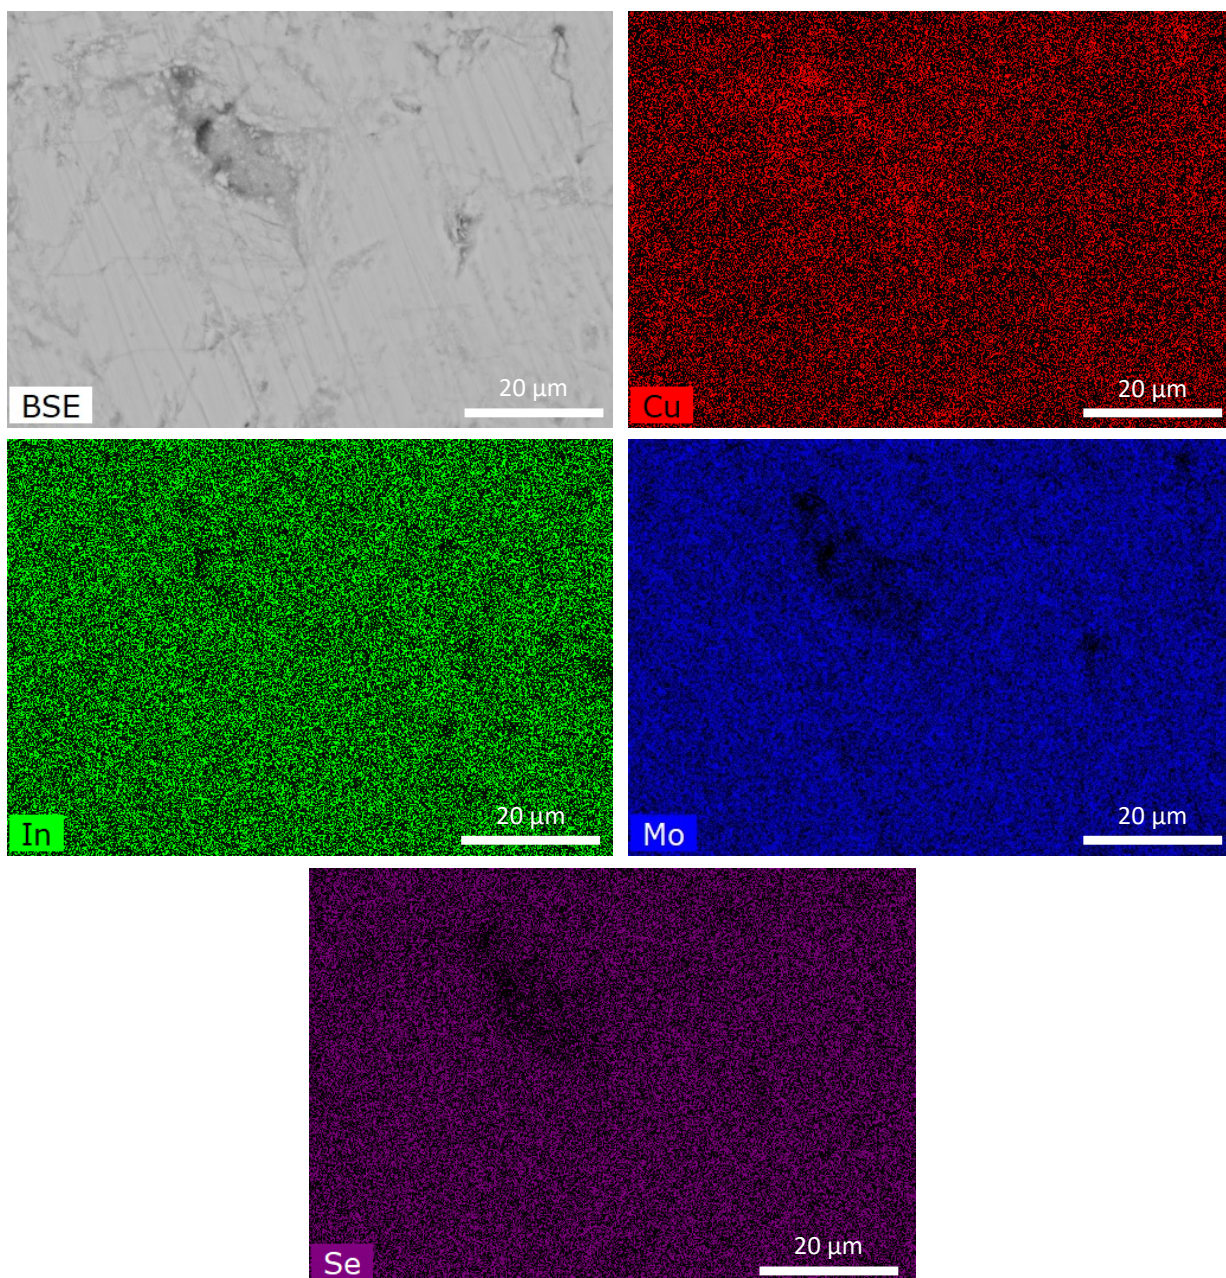

**Figure S5.** SEM image in backscattered electron mode (BSE) and its corresponding elemental X-ray maps for  $\text{Cu}_3\text{In}_2\text{Mo}_{15}\text{Se}_{19}$ .

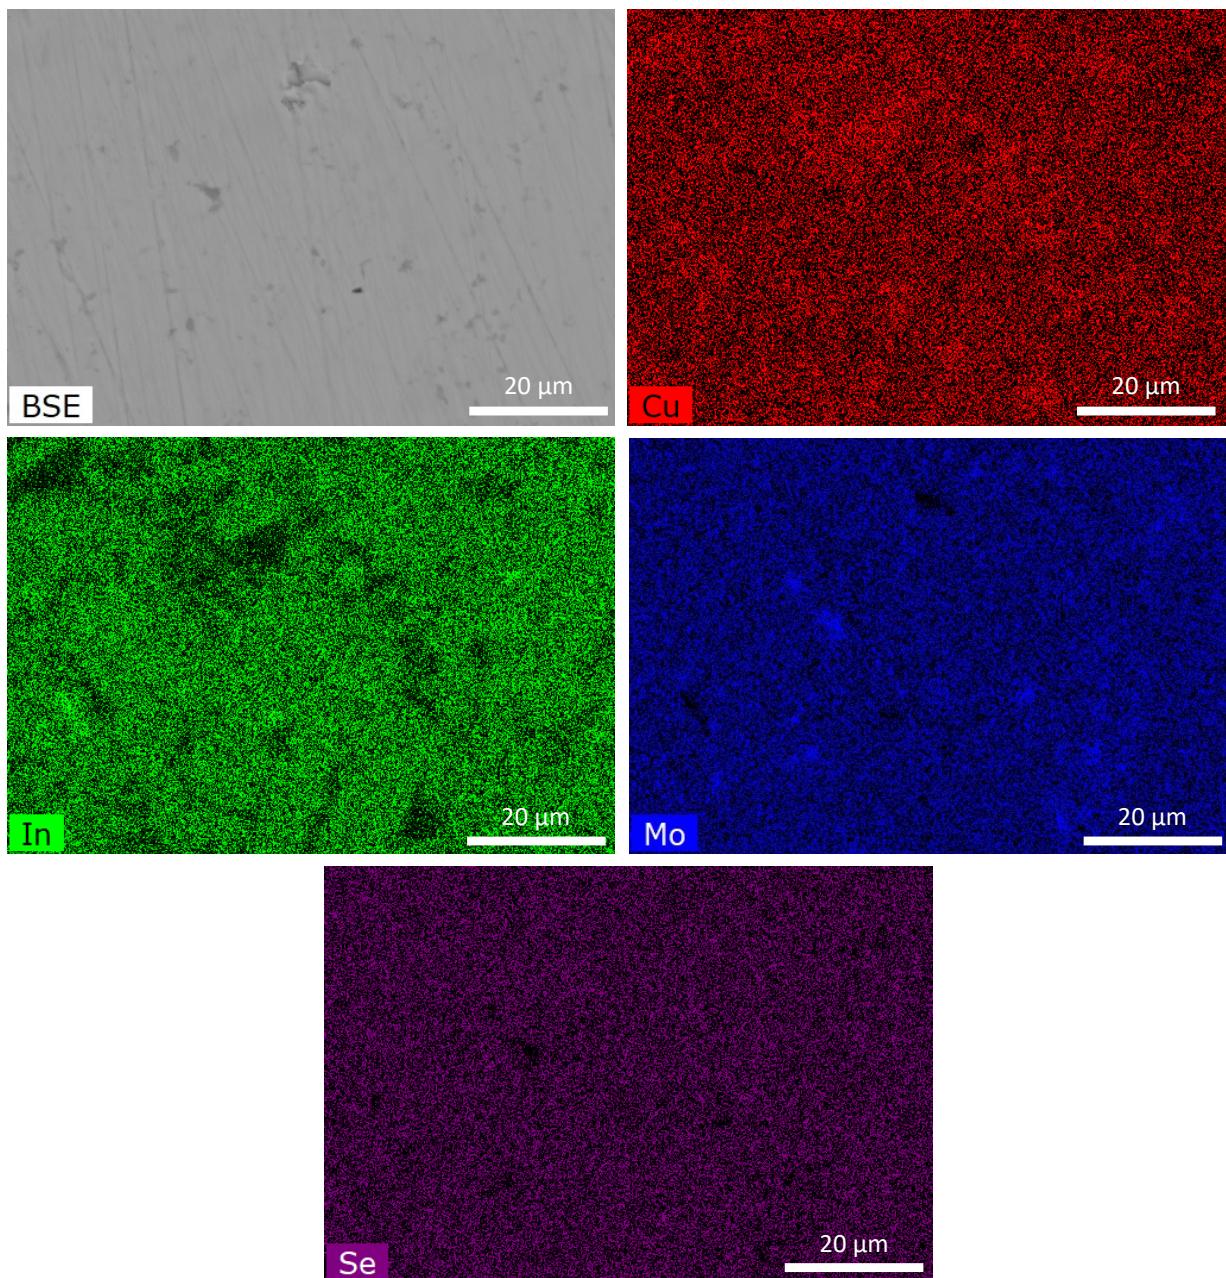

**Figure S6.** SEM image in backscattered electron mode (BSE) and its corresponding elemental X-ray maps for  $\text{Cu}_4\text{In}_2\text{Mo}_{15}\text{Se}_{19}$ .



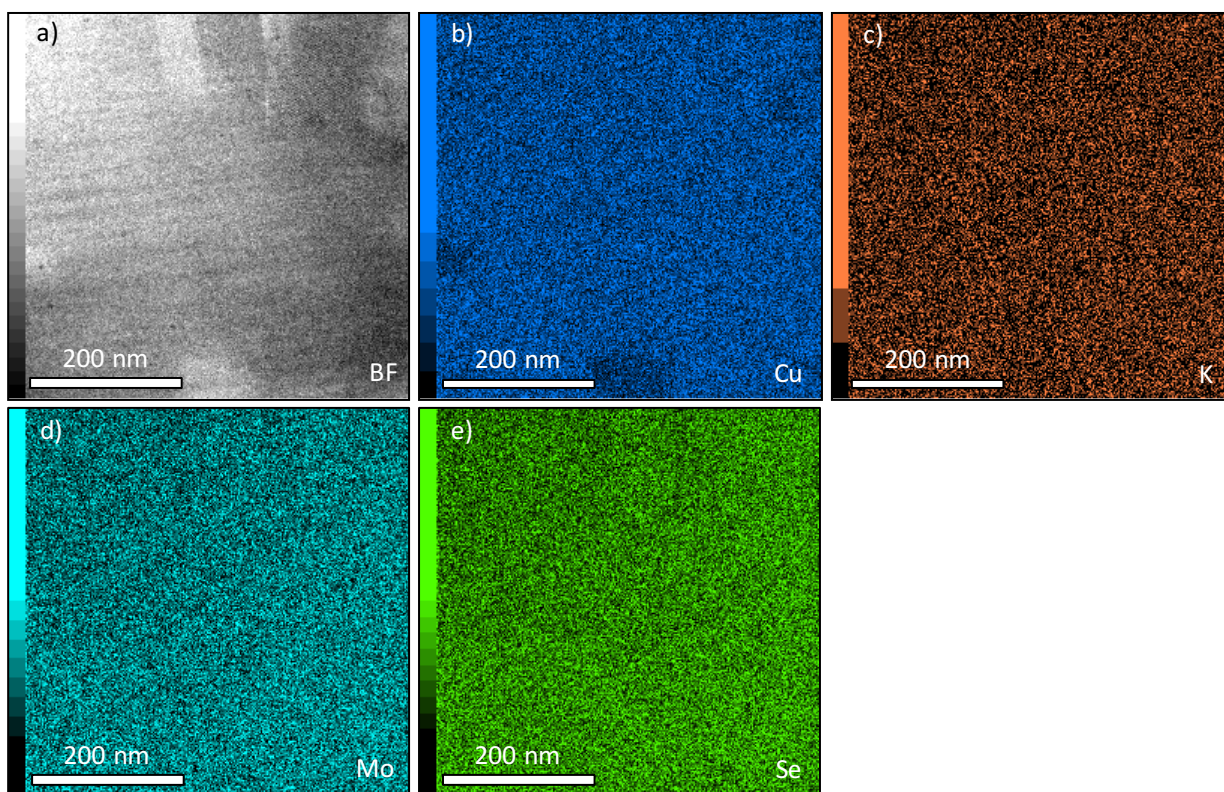

**Figure S7.** Bright-field image (BF, panel a) and corresponding elemental X-ray maps (panels b, c, d and e) obtained by scanning transmission electron microscopy (STEM) for  $\text{Cu}_3\text{K}_2\text{Mo}_{15}\text{Se}_{19}$ .



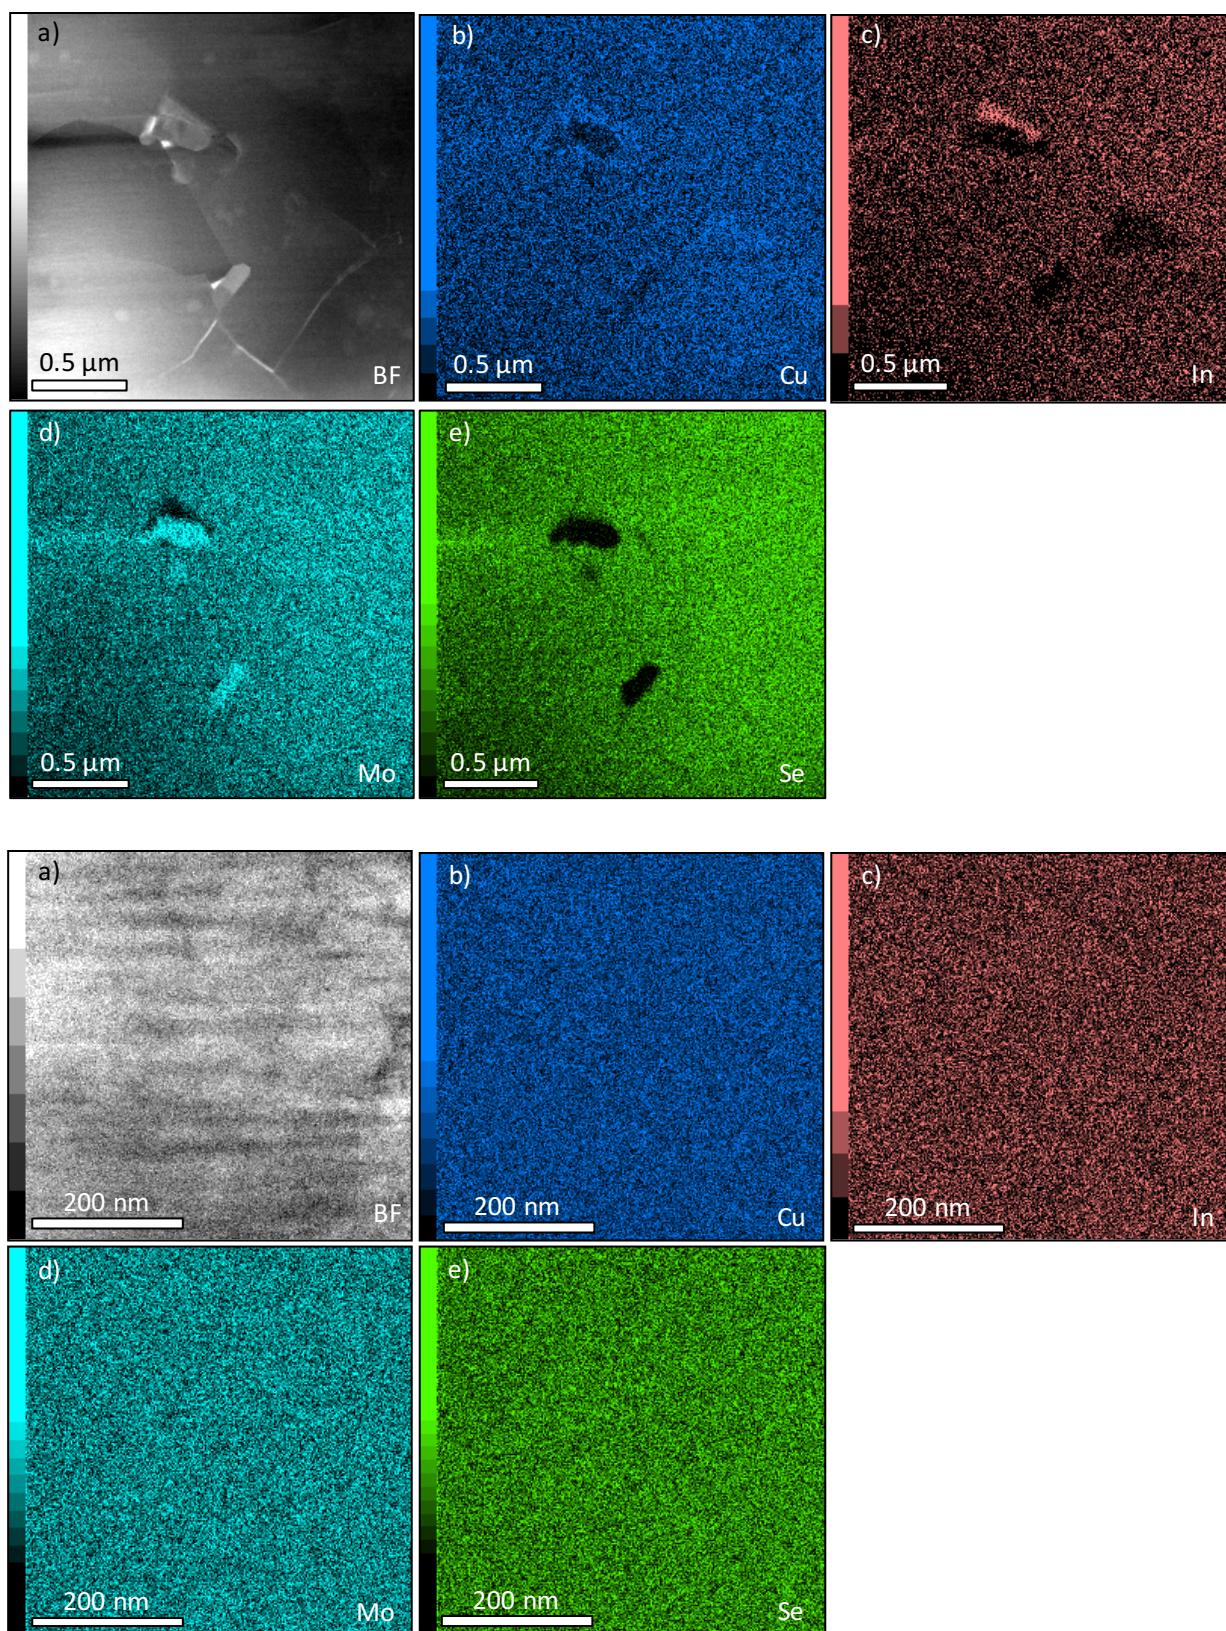

**Figure S8.** Bright-field image (BF) and corresponding elemental X-ray maps obtained by scanning transmission electron microscopy (STEM) for  $\text{Cu}_4\text{In}_2\text{Mo}_{15}\text{Se}_{19}$  at two different scales. The top panels show the presence of minute amounts of In-rich and Mo-rich phases.

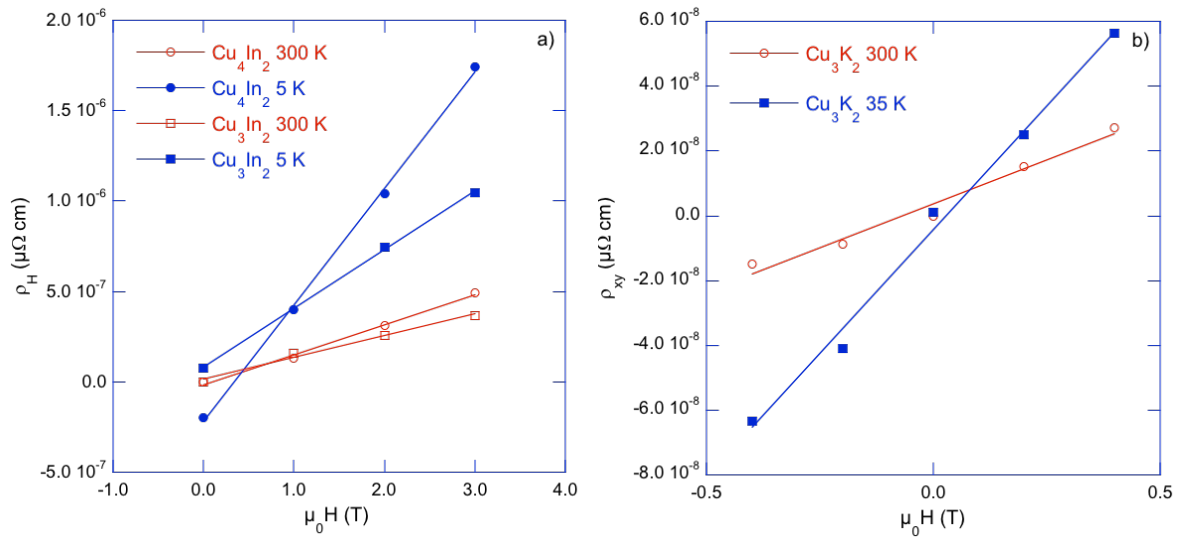

**Figure S9.** a) Magnetic field dependence of the Hall resistivity  $\rho_H$  at 300 and 5 K for the  $\text{Cu}_3\text{In}_2\text{Mo}_{15}\text{Se}_{19}$  and  $\text{Cu}_4\text{In}_2\text{Mo}_{15}\text{Se}_{19}$  compounds. b) Magnetic field dependence of the transverse electrical resistivity  $\rho_{xy}$  for  $\mu_0 H \rightarrow 0$  at 300 and 35 K for  $\text{Cu}_3\text{K}_2\text{Mo}_{15}\text{Se}_{19}$ . In both panels, the solid lines stand for the best linear fits to the data.

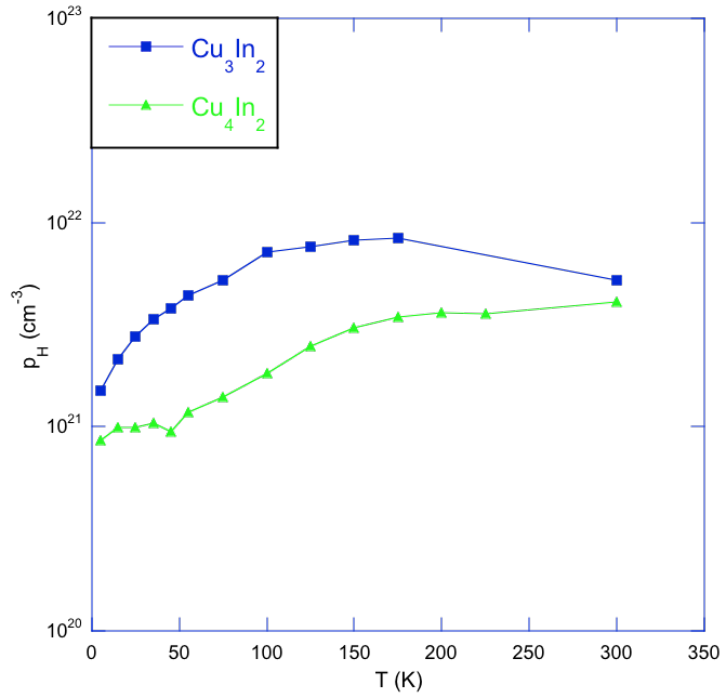

**Figure S10.** Temperature dependence of the hole concentration  $p_H$  for the  $\text{Cu}_3\text{In}_2\text{Mo}_{15}\text{Se}_{19}$  and  $\text{Cu}_4\text{In}_2\text{Mo}_{15}\text{Se}_{19}$  compounds. The solid lines are guides to the eye. The  $p_H$  values for  $\text{Cu}_3\text{K}_2\text{Mo}_{15}\text{Se}_{19}$  could not be determined reliably as a function of temperature due to the pronounced metallic character of this sample giving rise to very low Hall signals, difficult to resolve experimentally.
